# Supplementary material for: Rumen-derived Prevotella and Megasphaera elsdenii mitigate methane production through functional modulation of rumen microbial metabolism
Source: Research Square preprint supplement (doi:10.21203/rs.3.rs-8723424/v1), 2026-02-10
Supplement: Supplementary file 1 [file b7345a618345c2d41571c7ac.docx]

| Item | Value, g/kg DM |
| --- | --- |
| Ingredient composition |  |
| Alfalfa hay | 84 |
| Oatgrass hay | 64 |
| Corn silage | 522 |
| Corn flour | 81 |
| Soybean meal | 108 |
| Whole cottonseed | 68 |
| DDGS1 | 48 |
| Premix2 | 25 |
| Total | 1000 |
| Nutritional level3 |  |
| CP | 15.16 |
| EE | 3.74 |
| NDF | 33.48 |
| ADF | 22.06 |
| Ash | 7.12 |
| Ca | 0.43 |
| P | 0.26 |
| NEL, MJ/kg4 | 6.32 |

**Table S1 Composition and nutritional level of diets for dairy cows (DM basis)**

Note: 1: DDGS: Distillers' dried grains with solubles.

2: Per kilogram of premix provides: 60 mg manganese, 80 mg zinc, 0.55 mg selenium, 75 mg iron, 35 mg copper, 1.00 mg iodine, 0.40 mg cobalt, 200,000 IU vitamin A, 30,000 IU vitamin D, and 1,000 IU vitamin E.

3: CP: crude protein, EE: ether extract, NDF: neutral detergent fiber, ADF: acid detergent fiber.

4: The NEL was calculated, and the other values were measured.

**Table S2 Substrates fermentable by *Prevotella* and *Megasphaera elsdenii*.**

| Items | Result1 | | | | |
| --- | --- | --- | --- | --- | --- |
| RH3 | RH14 | RH19 | RH27 | RH35 |
| ONPG | ＋ | ＋ | － | ＋ | ＋ |
| Arginine | － | － | ＋ | － | － |
| Lysine | － | － | ＋ | － | － |
| Ornithine | － | － | ＋ | － | ＋ |
| Citric acid | － | － | － | － | － |
| Hydrothion | － | － | － | － | － |
| Urease | － | － | － | － | ＋ |
| Indole | － | － | － | － | － |
| VP | ＋ | ＋ | － | ＋ | ＋ |
| Gelatin | － | － | － | － | － |
| Gucose | ＋ | ＋ | ＋ | ＋ | ＋ |
| Inose | － | － | － | － | － |
| Sorbitol | － | － | － | － | － |
| Rhamnose | － | － | － | － | － |
| Melibiose | － | － | － | － | － |
| Amygdalin | － | － | － | － | － |
| Arabinose | ＋ | － | － | ＋ | － |
| Oxidase | － | － | － | － | － |
| Aesculin | ＋ | ＋ | － | ＋ | ＋ |
| Cellobiose | ＋ | ＋ | － | ＋ | ＋ |
| Maltose | ＋ | ＋ | ＋ | ＋ | ＋ |
| Mannitol | － | － | ＋ | － | ＋ |
| Salicin | ＋ | ＋ | － | ＋ | ＋ |
| Sorbitol | － | － | － | － | － |
| Sucrose | ＋ | ＋ | － | ＋ | ＋ |
| Raffinose | － | － | － | － | － |
| Synanthrin | ＋ | ＋ | － | ＋ | ＋ |
| Lactose | － | － | － | － | － |

Note: 1: “＋” Fermentable; “－” Un- fermentable. RH3 = *Prevotella RH3*; RH14 = *Prevotella RH14*; RH19 = *Megasphaera elsdenii* *RH19*; RH27 = *Prevotella RH27*; RH35 = *Prevotella RH35*.

**Table S3 Genomic characteristics of *Prevotella* and *Megasphaera elsdenii***

| **Genomic Contents** | **RH3** | **RH14** | **RH19** | **RH27** | **RH35** |
| --- | --- | --- | --- | --- | --- |
| Raw data (Mb) | 1191.3 | 1190 | 1160.3 | 1105.4 | 1266.9 |
| Clean data (Mb) | 1124.7 | 1121.7 | 1096.7 | 1047.5 | 1196.1 |
| Total scaffolds | 45 | 153 | 63 | 156 | 155 |
| Sequence length (bp) | 5241519 | 4637358 | 2429558 | 4638824 | 4639038 |
| GC content (%) | 37.49 | 50.48 | 53.26 | 50.76 | 51.12 |
| Gengset number | 5519 | 4514 | 2258 | 4515 | 4516 |
| Gene total length | 4490847 | 4046904 | 2121984 | 4047036 | 4047180 |
| Gene average length | 813 | 896 | 939 | 896 | 896 |
| Number of tRNAs | 67 | 73 | 55 | 77 | 79 |
| Number of 5S rRNAs | 7 | 0 | 4 | 0 | 0 |
| Number of 6S rRNAs | 0 | 1 | 1 | 1 | 1 |
| Number of 23S rRNAs | 2 | 1 | 1 | 1 | 1 |
| Total protein | 5519 | 4514 | 2258 | 4515 | 4516 |
| NR | 5329 | 4307 | 2151 | 4306 | 4309 |
| GO | 1174 | 3167 | 560 | 3168 | 3168 |
| eggNOG | 4106 | 3752 | 1911 | 3752 | 3753 |
| KEGG | 2670 | 3147 | 1241 | 3147 | 3146 |
| CAZy | 152 | 121 | 71 | 121 | 121 |

Note: RH3 = *Prevotella RH3*; RH14 = *Prevotella RH14*; RH19 = *Megasphaera elsdenii* *RH19*; RH27 = *Prevotella RH27*; RH35 = *Prevotella RH35*.

**Table S4** Summary of sequence data generated from in vitro rumen fermentation samples

| Sample | Raw reads | Clean reads |
| --- | --- | --- |
| NC-1 | 69682530 | 69205344 |
| NC-2 | 68447452 | 67979746 |
| NC-3 | 73502074 | 73061594 |
| RH3-1 | 76261472 | 75758554 |
| RH3-2 | 70948856 | 70485814 |
| RH3-3 | 71276350 | 70798726 |
| RH14-1 | 66896626 | 66468974 |
| RH14-2 | 73563494 | 73074280 |
| RH14-3 | 69370074 | 68873394 |
| RH19-1 | 73064142 | 72654436 |
| RH19-2 | 72701084 | 72313042 |
| RH19-3 | 72526184 | 72150686 |
| RH27-1 | 67548182 | 67164882 |
| RH27-2 | 72899544 | 72504080 |
| RH27-3 | 74393146 | 73939734 |
| RH35-1 | 72178168 | 71803092 |
| RH35-2 | 72511618 | 72122290 |
| RH35-3 | 84788338 | 84331996 |
| Total | 1302559334 | 1294690664 |
| mean | 72364407 | 71927259 |
| SD | 3949254 | 3944204 |
| SEM | 930848 | 929658 |

Note: NC = negative control; RH3 = *Prevotella RH3*; RH14 = *Prevotella RH14*; RH19 = *Megasphaera elsdenii* *RH19*; RH27 = *Prevotella RH27*; RH35 = *Prevotella RH35*.

**Table S5** Comparison of microbial domains among NC, RH3, RH14, RH19, RH27 and RH35 rumen fermentation samples

| Items (%) | Dietary treatment | | | | | | SEM | *P*-value |
| --- | --- | --- | --- | --- | --- | --- | --- | --- |
| NC | RH3 | RH14 | RH19 | RH27 | RH35 |
| Bacteria | 94.59 | 95.24 | 95.23 | 95.40 | 95.68 | 95.09 | 0.129 | 0.238 |
| Archaea | 3.40 | 2.83 | 2.90 | 2.71 | 2.52 | 2.86 | 0.112 | 0.504 |
| Eukaryota | 0.032 | 0.045 | 0.047 | 0.051 | 0.043 | 0.051 | 0.002 | 0.329 |
| Viruses | 1.98 | 1.89 | 1.83 | 1.84 | 1.75 | 2.00 | 0.045 | 0.127 |

Note: Data were analyzed using the Kruskal–Wallis multiple comparisons, and significance was declared at *P* < 0.05.

NC = negative control; RH3 = *Prevotella RH3*; RH14 = *Prevotella RH14*; RH19 = *Megasphaera elsdenii* *RH19*; RH27 = *Prevotella RH27*; RH35 = *Prevotella RH35*.

**Table S6** The relative abundances of GH family genes coded fibrolytic enzymes

| CAZymes family | Dietary treatment | | | | | | SD | *P*-value |
| --- | --- | --- | --- | --- | --- | --- | --- | --- |
| NC | RH3 | RH14 | RH19 | RH27 | RH35 |
| GH1 | 0.15c | 0.15c | 0.14c | 0.14c | 0.16b | 0.19a | 0.02 | 0.04 |
| GH2 | 6.63 | 6.74 | 6.68 | 6.72 | 6.68 | 6.61 | 0.12 | 0.44 |
| GH3 | 2.48 | 2.49 | 2.46 | 2.46 | 2.54 | 2.50 | 0.05 | 0.62 |
| GH4 | 0.07b | 0.07b | 0.07b | 0.06c | 0.08a | 0.08a | 0.01 | 0.02 |
| GH5 | 0.10 | 0.09 | 0.09 | 0.08 | 0.12 | 0.09 | 0.01 | 0.06 |
| GH8 | 0.24 | 0.25 | 0.25 | 0.25 | 0.23 | 0.25 | 0.01 | 0.36 |
| GH9 | 0.48 | 0.46 | 0.47 | 0.48 | 0.46 | 0.47 | 0.02 | 0.53 |
| GH10 | 0.94 | 0.98 | 0.96 | 0.98 | 0.89 | 0.93 | 0.03 | 0.06 |
| GH11 | 0.005 | 0.006 | 0.005 | 0.005 | 0.006 | 0.006 | 0.002 | 0.32 |
| GH26 | 0.74 | 0.74 | 0.73 | 0.75 | 0.69 | 0.71 | 0.03 | 0.20 |
| GH30 | 0.02 | 0.02 | 0.02 | 0.02 | 0.02 | 0.02 | 0.001 | 0.54 |
| GH31 | 0.19 | 0.18 | 0.18 | 0.19 | 0.19 | 0.19 | 0.01 | 0.89 |
| GH38 | 0.06a | 0.05b | 0.05b | 0.05b | 0.06a | 0.06a | 0.005 | 0.01 |
| GH39 | 0.16b | 0.15bc | 0.15bc | 0.14cd | 0.20a | 0.15bc | 0.01 | 0.04 |
| GH43 | 0.05 | 0.05 | 0.05 | 0.05 | 0.05 | 0.05 | 0.003 | 0.83 |
| GH44 | 0.001 | 0.001 | 0.001 | 0.001 | 0.0004 | 0.001 | 0.0002 | 0.13 |
| GH45 | 0.001 | 0.0003 | 0.001 | 0.001 | 0.0003 | 0.001 | 0.001 | 0.19 |
| GH48 | 0.0002 | 0.0001 | 0.0003 | 0.0001 | 0.0005 | 0.0001 | 0.0002 | 0.20 |
| GH51 | 0.04 | 0.05 | 0.05 | 0.05 | 0.04 | 0.04 | 0.004 | 0.73 |
| GH52 | 0.0003 | 0.0003 | 0 | 0.0002 | 0.0001 | 0.0001 | 0.0002 | 0.47 |
| GH54 | 0.02 | 0.02 | 0.02 | 0.02 | 0.02 | 0.02 | 0.002 | 0.14 |
| GH62 | 0.0001 | 0.0003 | 0.0002 | 0.0004 | 0.0002 | 0.0002 | 0.0002 | 0.74 |
| GH67 | 0.47b | 0.48b | 0.48b | 0.50a | 0.43c | 0.46b | 0.011 | 0.04 |
| GH74 | 0.24 | 0.23 | 0.23 | 0.23 | 0.24 | 0.22 | 0.013 | 0.20 |
| GH92 | 1.34ab | 1.25c | 1.28b | 1.21d | 1.39a | 1.26c | 0.044 | 0.02 |
| GH98 | 0.05 | 0.05 | 0.05 | 0.05 | 0.04 | 0.05 | 0.005 | 0.14 |
| GH113 | 0.03a | 0.03a | 0.02b | 0.02b | 0.03a | 0.03a | 0.002 | 0.03 |
| GH116 | 0.01 | 0.01 | 0.01 | 0.01 | 0.01 | 0.01 | 0.003 | 0.52 |
| GH120 | 0.01 | 0.01 | 0.01 | 0.02 | 0.02 | 0.02 | 0.002 | 0.13 |
| GH124 | 0.02 | 0.02 | 0.02 | 0.02 | 0.02 | 0.03 | 0.002 | 0.64 |

Note: The difference among six groups was identified by the Kruskal–Wallis multiple comparisons, and the *P* < 0.05 indicated the significant difference.

GH, glycoside hydrolase. NC = negative control; RH3 = *Prevotella RH3*; RH14 = *Prevotella RH14*; RH19 = *Megasphaera elsdenii* *RH19*; RH27 = *Prevotella RH27*; RH35 = *Prevotella RH35*

Figure S1 CAZyme annotation profile of *Prevotella* and *Megasphaera elsdenii* strains.

Figure S2. (A) Abundance distribution of Eukaryota at phylum, genus, and species levels. (B) Differential abundance analysis of Eukaryota at phylum, genus, and species levels. (C) Circos plot representing Eukaryota. The difference among six groups was identified by Kruskal–Wallis multiple comparisons, and asterisk indicated the significant difference (*P* <  0.05).


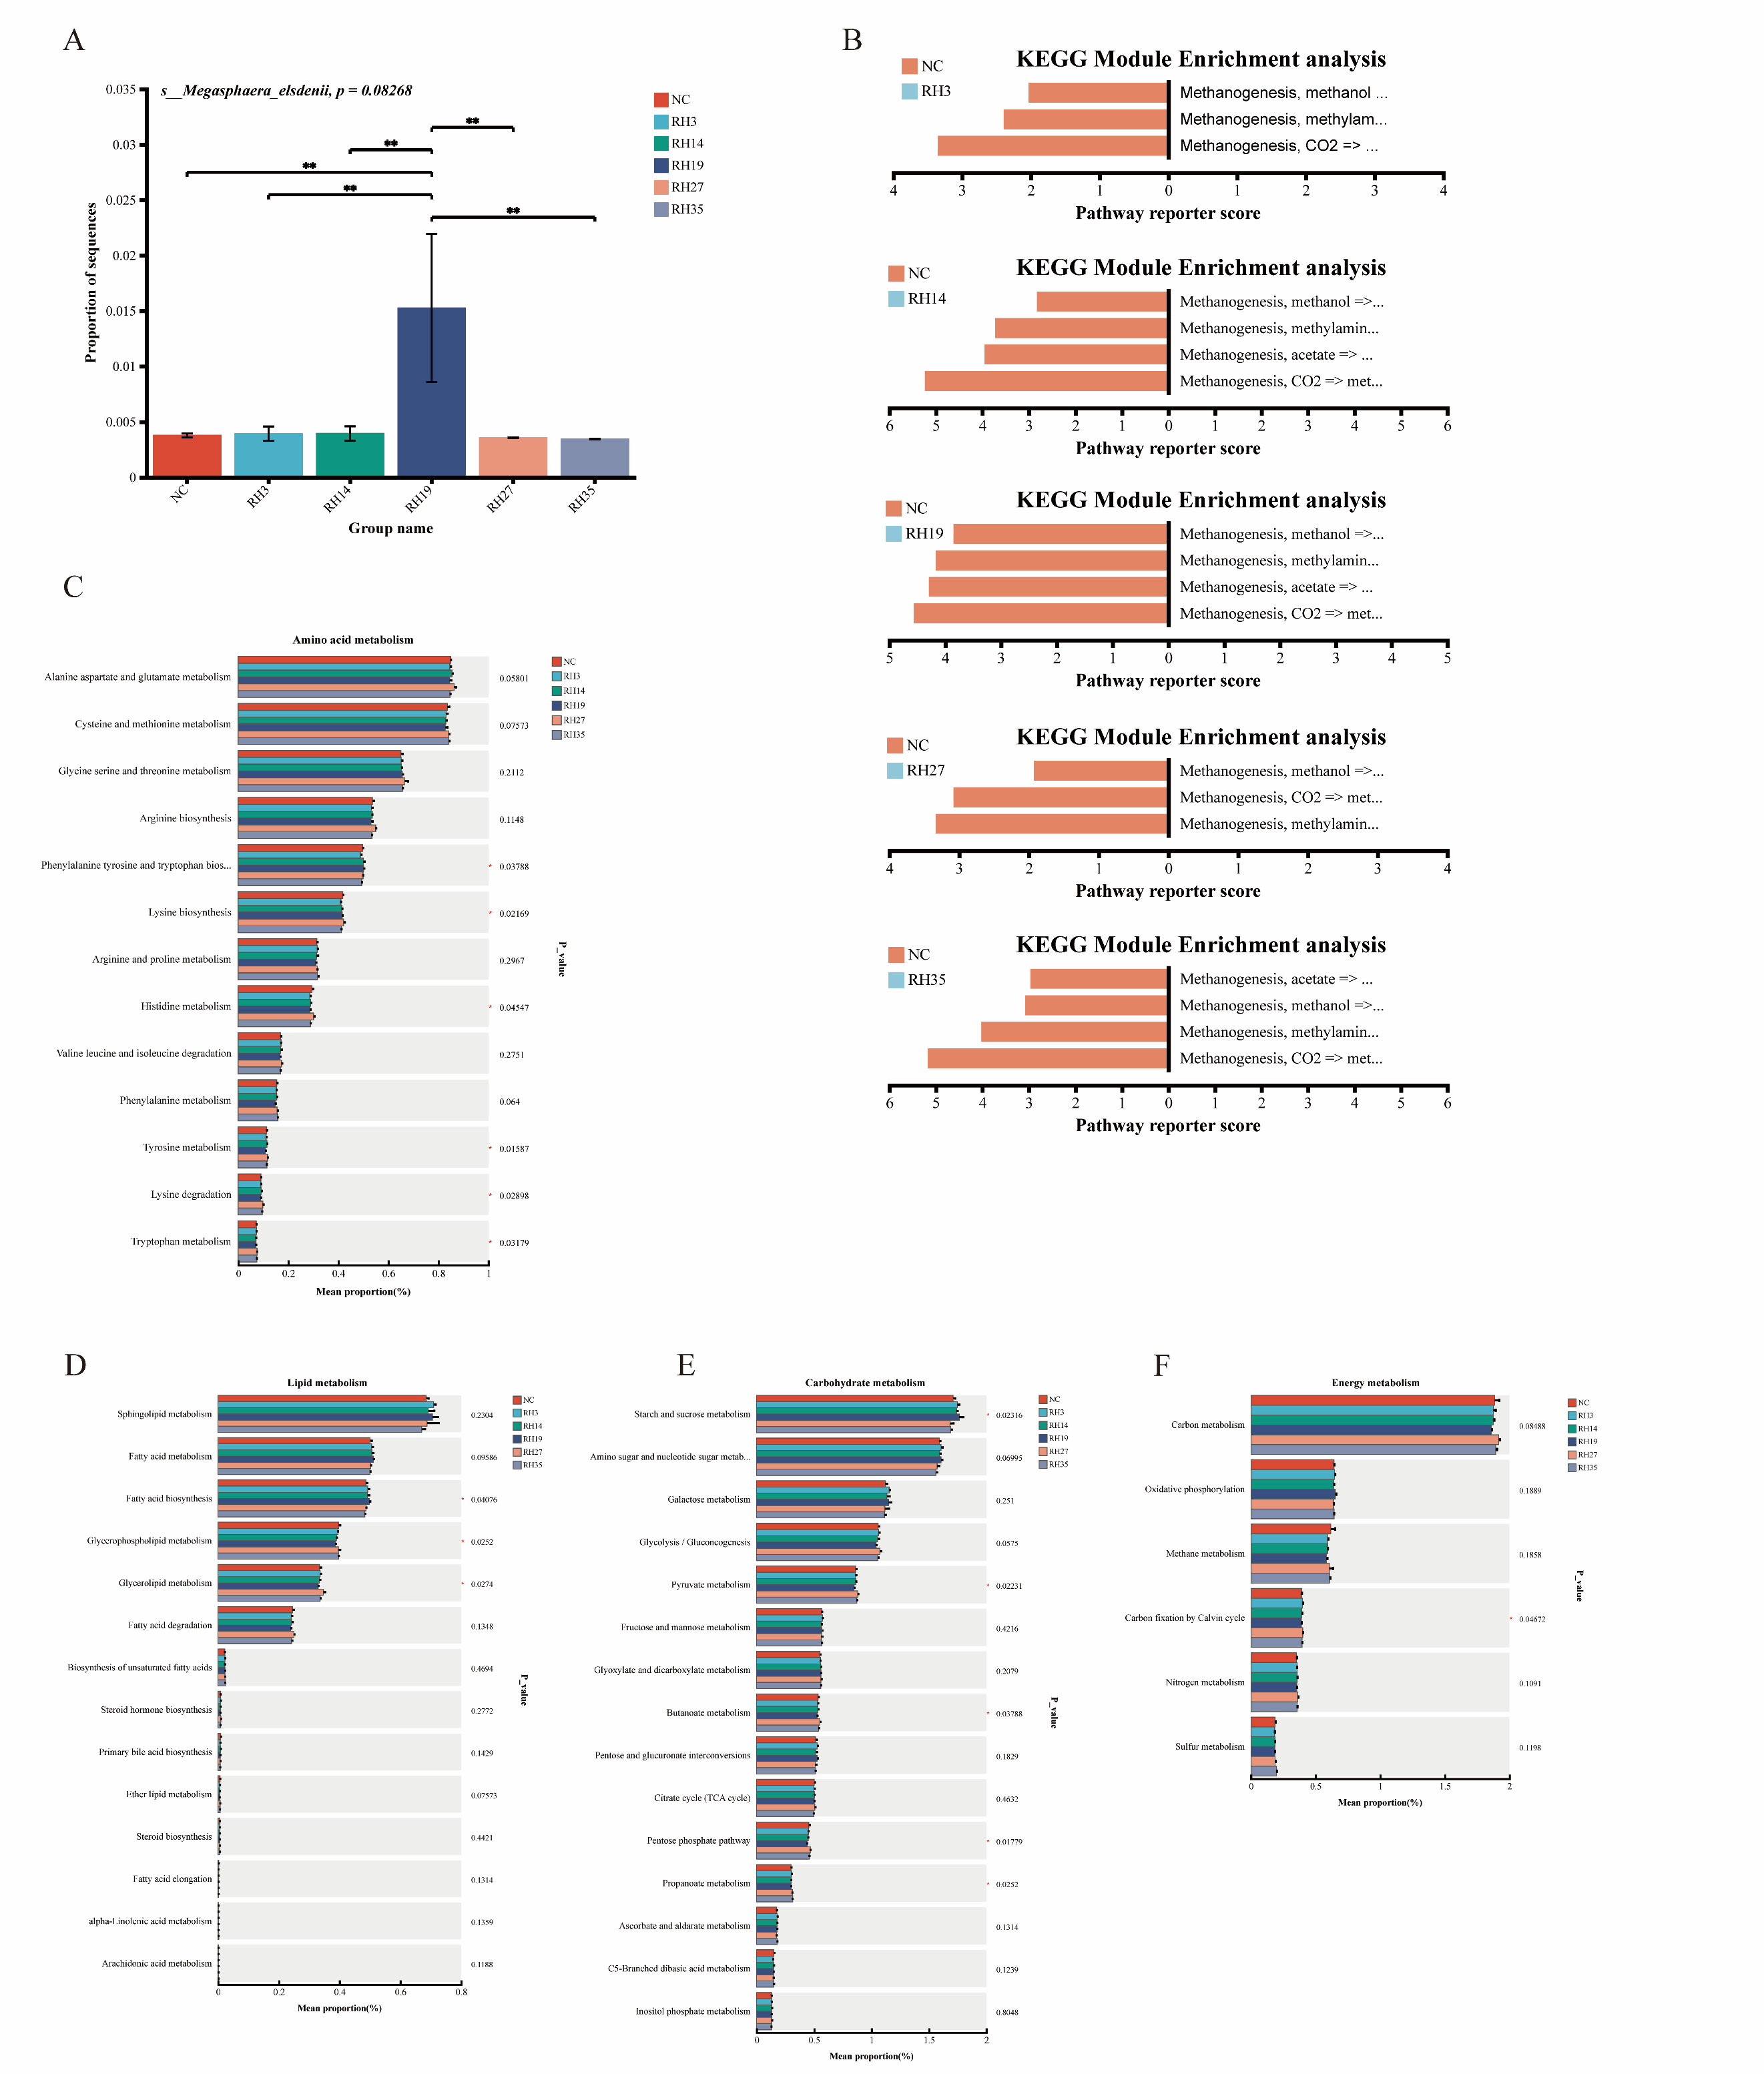
Figure S3. Differential abundance of *Megasphaera elsdenii* and major metabolic pathways identified in the metagenome of the in vitro dairy cows fermentation model. (A) Differences in the abundance of *s_Megasphaera_elsdenii* across various treatments. (B) Comparison of methanogenesis-related KEGG modules between different treatments and the control group. (C) Amino acid metabolism. (D) Lipid metabolism. (E) Carbohydrate metabolism. (F) Energy metabolism. Asterisks indicate significant differences (*P* < 0.05).


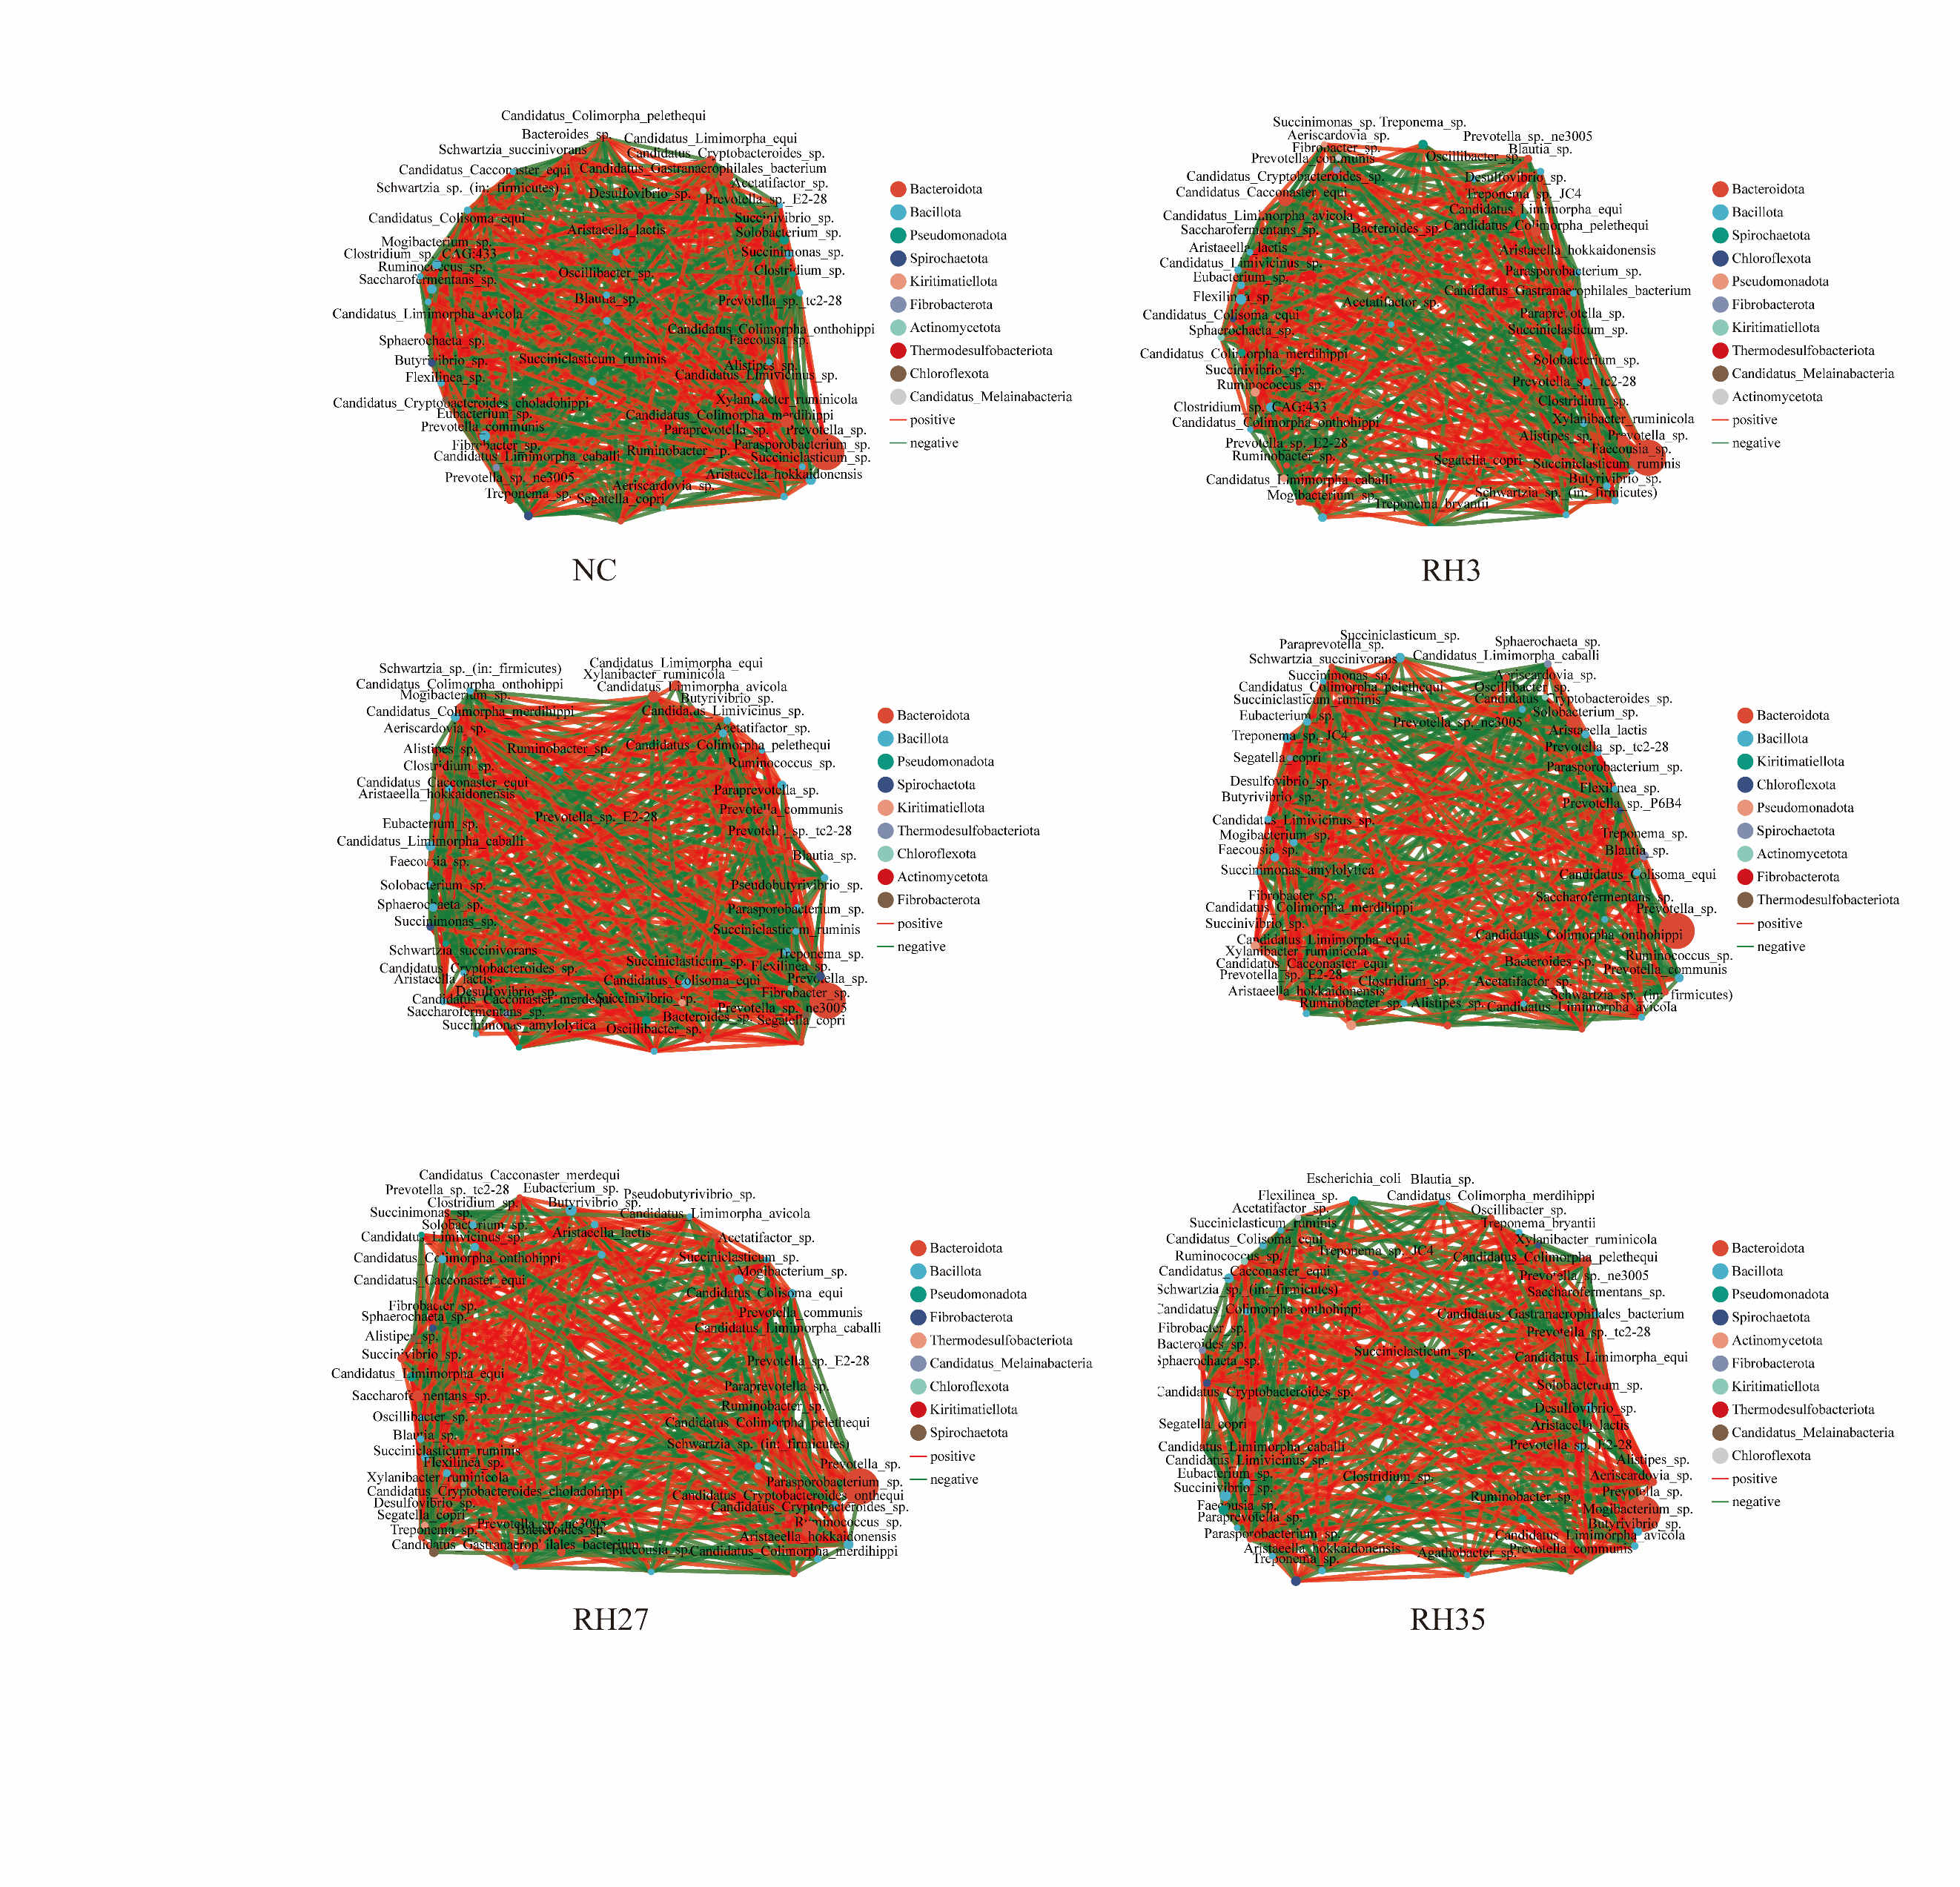
Figure S4 The co‑occurrence among rumen bacteria of supplementation with *Prevotella* and *Megasphaera elsdenii*. Only significant (*P*  <  0.05) relationships were shown. Red edges indicate positive relationships, and green edges indicate negative relationships. The node size is proportional to the mean abundance.


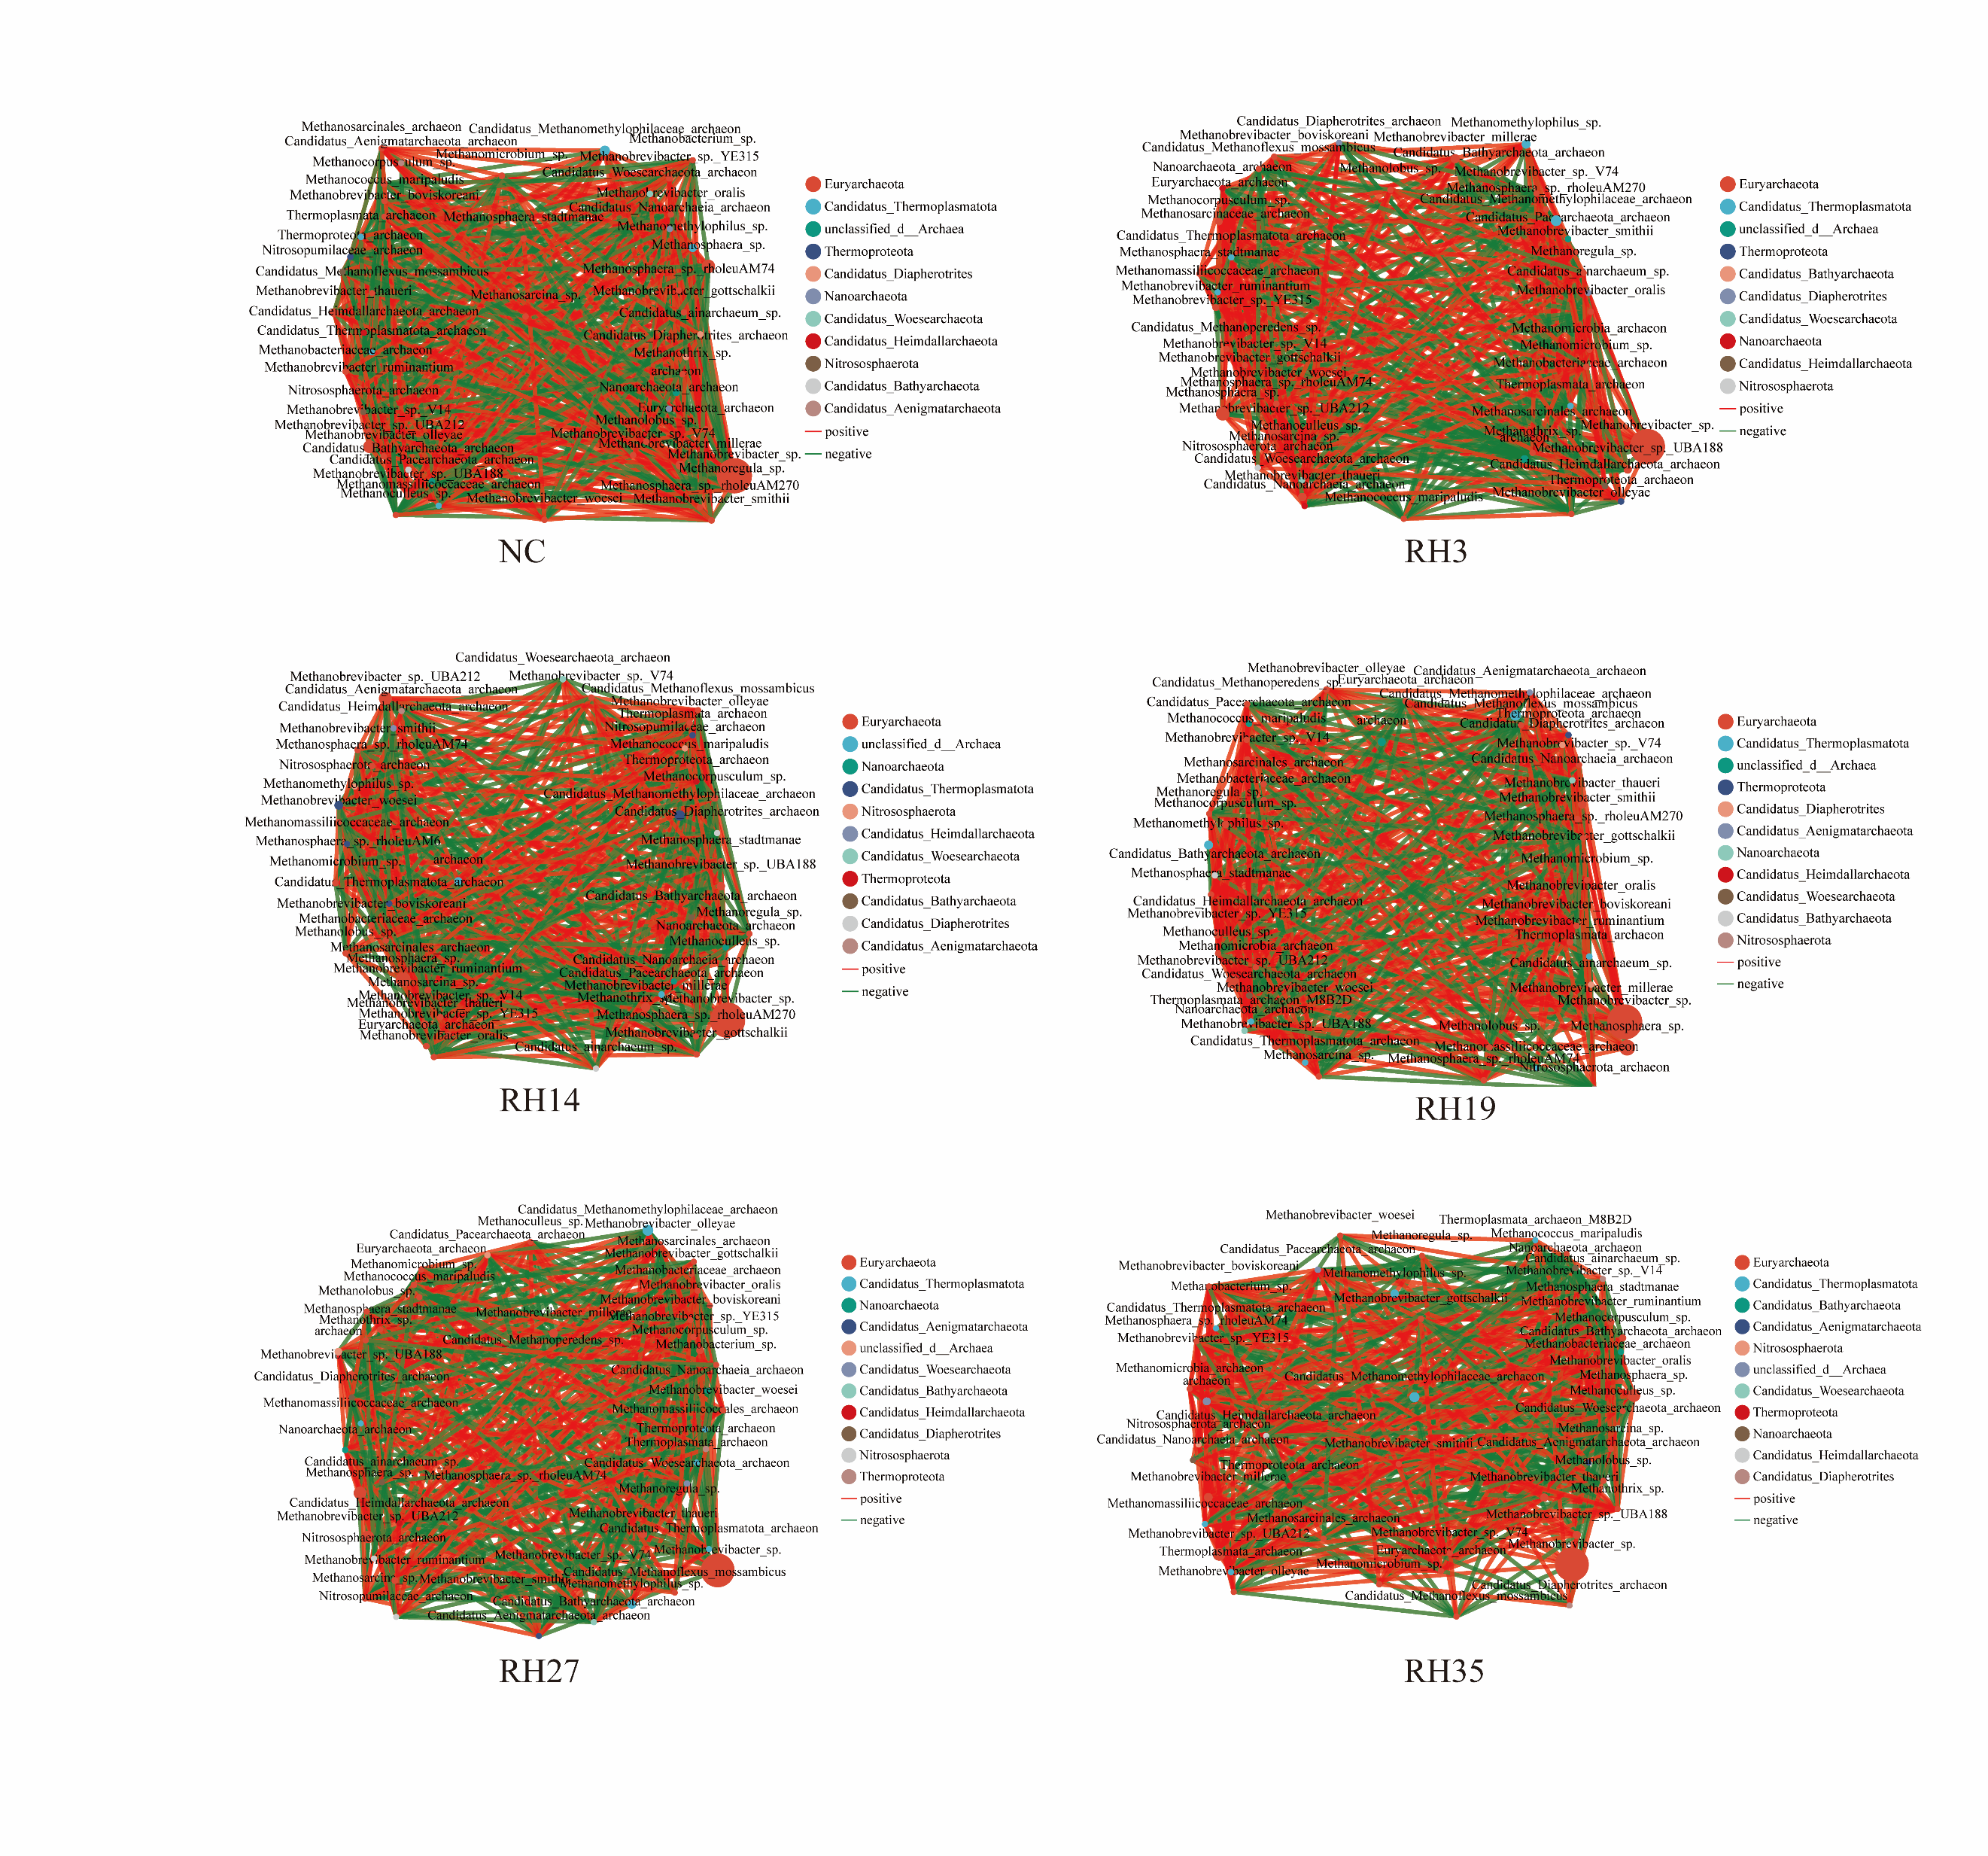
Figure S5 The co‑occurrence among rumen archaea of supplementation with *Prevotella* and *Megasphaera elsdenii*. Only significant (*P*  <  0.05) relationships were shown. Red edges indicate positive relationships, and green edges indicate negative relationships. The node size is proportional to the mean abundance.
